# Supplementary material for: Degradation and conversion of toxic compounds into useful bioplastics by Cupriavidus sp. CY-1: relative expression of the PhaC gene under phenol and nitrogen stress
Source: Royal Society of Chemistry journal article supplement (doi:10.1039/c5gc01156f), 2015-01-01
Supplement: c5gc01156f1.pdf [file c5gc01156f1.pdf]

**Degradation and conversion of toxic compounds into useful bioplastics by *Cupriavidus* sp. CY-1: Relative expression of PhaC gene under phenol and nitrogen stress**

**M. Venkateswar Reddy<sup>1</sup>, Yuka Yajima<sup>2</sup>, Yasuteru Mawatari<sup>3</sup>, Tamotsu Hoshino<sup>4,5</sup>,  
Young-Cheol Chang<sup>1\*</sup>**

<sup>1</sup>Department of Applied Sciences, College of Environmental Technology,  
Muroran Institute of Technology, 27-1 Mizumoto, Muroran, 050-8585, Japan,

<sup>2</sup>Graduate School of Medicine, Kyoto University, Yoshidakonoe-cho, Sakyo-ku,  
Kyoto-shi, Kyoto, 606-8501, Japan,

<sup>3</sup>Research Center for Environmentally Friendly Materials Engineering, Muroran  
Institute of Technology, 27-1 Mizumoto-cho, Muroran, Hokkaido 050-8585, Japan,

<sup>4</sup>Biomass Refinery Research Center, National Institute of Advanced Industrial  
Sciences and Technology (AIST), 3-11-32 Kagamiyama, Higashi-Hiroshima,  
Hiroshima 739-0046, Japan,

<sup>5</sup>Bioproduction Research Institute, National Institute of Advanced Industrial Sciences  
and Technology (AIST), 2-17-2-1Tsukisamu-Higashi, Toyohira-ku, Sapporo 062-8517,  
Japan

E-mail: [ychang@mmm.muroran-it.ac.jp](mailto:ychang@mmm.muroran-it.ac.jp)

**Table S1: Conditions maintained for analysis of various toxic compounds using HPLC**

| S. NO | Compound name       | HPLC conditions |                                     |                      |
|-------|---------------------|-----------------|-------------------------------------|----------------------|
|       |                     | Detector (nm)   | Mobile phase (% ratio)              | Retention time (min) |
| 1     | 4-BP <sup>1</sup>   | 277             | Acetonitrile: water (8:2)           | 3                    |
| 2     | 4-s-BP <sup>2</sup> | 277             | Acetonitrile: water (8:2)           | 3                    |
| 3     | 4-t-BP <sup>3</sup> | 277             | Acetonitrile: water (8:2)           | 3                    |
| 4     | 4-t-OP <sup>4</sup> | 277             | Acetonitrile: water (8:2)           | 5.3                  |
| 5     | 4-NP <sup>5</sup>   | 277             | Acetonitrile: water (8:2)           | 7.2                  |
| 6     | Phenol              | 277             | Acetonitrile: water (8:2)           | 3                    |
| 7     | 4-chlorophenol      | 280             | Acetonitrile: 1% Ethylacetate (1:1) | 3                    |
| 8     | Naphthalene         | 254             | Acetonitrile: water (8:2)           | 2.1                  |
| 9     | Phenanthrene        | 254             | Acetonitrile: water (8:2)           | 5.5                  |

4-BP<sup>1</sup>: 4-butylphenol; 4-s-BP<sup>2</sup>: 4-secondary butylphenol; 4-t-BP<sup>3</sup>: 4-tertiary butylphenol; 4-t-OP<sup>4</sup>: 4-tertiary octylphenol; 4-NP<sup>5</sup>: 4-nonylphenol.

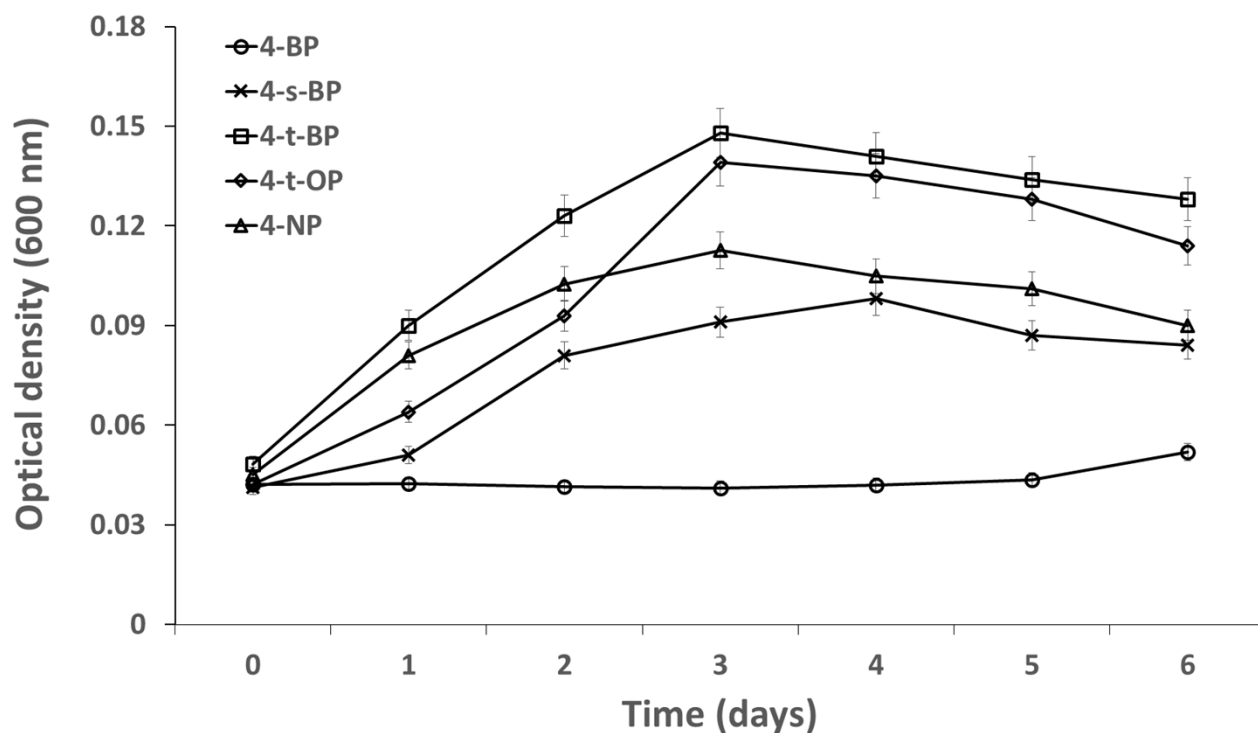

**Figure S1: Growth curve of *Cupriavidus* sp. CY-1 with various alkylphenols. Bacteria were incubated at 100 mg/l concentration of different toxic compounds in MSM media without Tween-80 at 30°C. The optical density (OD at 600 nm) of each sample was measured at different time intervals.**

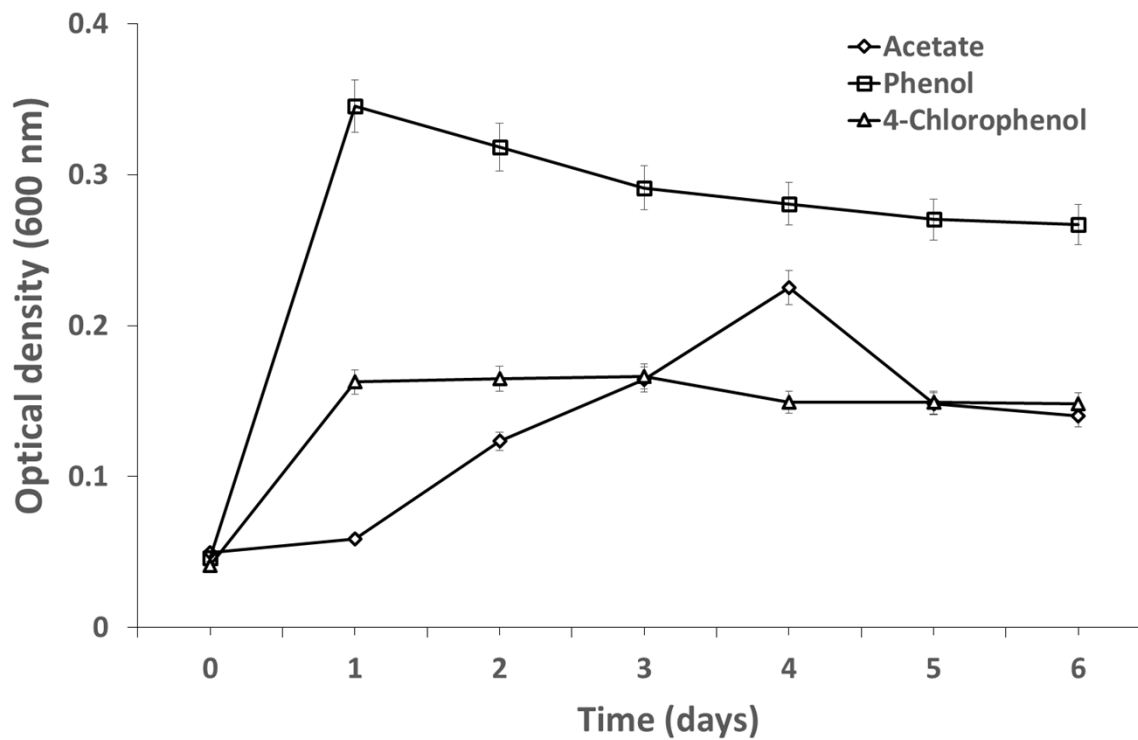

**Figure S2: Growth curve of *Cupriavidus* sp. CY-1 with phenol, 4-chlorophenol and sodium acetate. Bacteria were incubated at 100 mg/l concentration of substrate in MSM media without Tween-80 at 30°C. The optical density (OD at 600 nm) of each sample was measured at different time intervals.**
